# Supplementary material for: Small Molecules Targeted to a Non-Catalytic “RVxF” Binding Site of Protein Phosphatase-1 Inhibit HIV-1
Source: PLOS journal article supplement (doi:10.1371/journal.pone.0039481), 2012-06-29

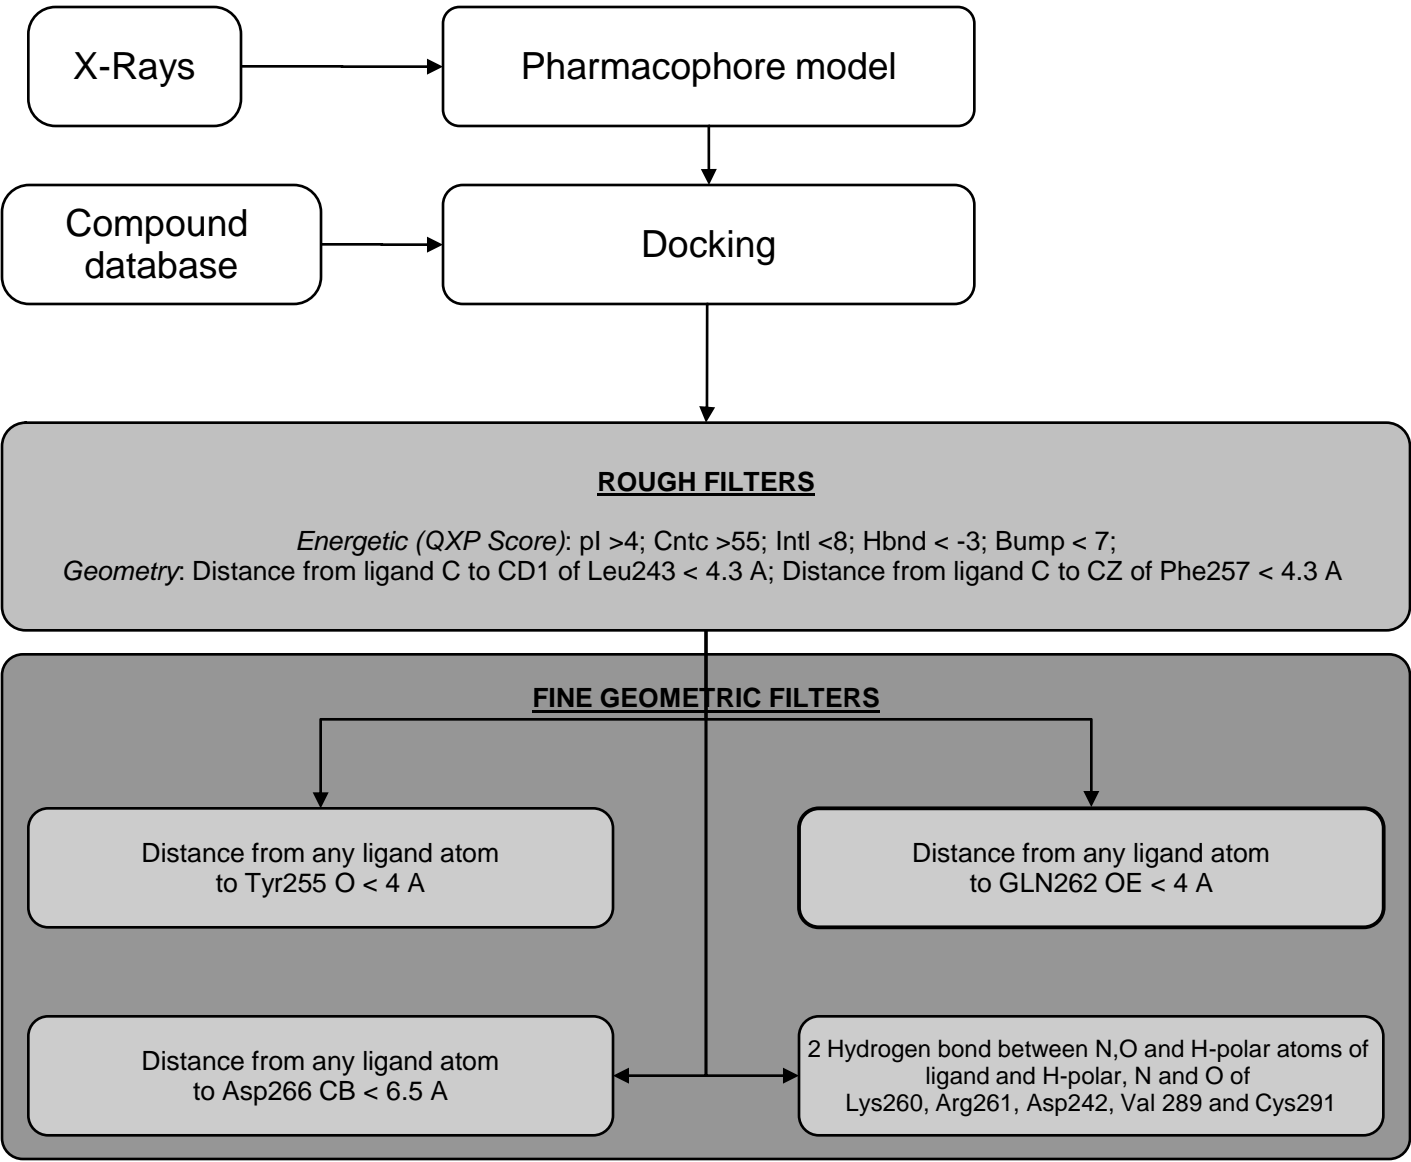

Supplement: S1 (10.1371/journal.pone.0039481.s001) [file journal.pone.0039481.s001]
